# Supplementary material for: Foot and Ankle Care by Podiatrists and Amputations in Patients With Diabetes and Kidney Failure
Source: PubMed Central journal article supplement (PMC10907919; doi:10.1001/jamanetworkopen.2024.0801), 2024-03-01
Supplement: jamanetwopen-e240801-s001.pdf [file jamanetwopen-e240801-s001.pdf]

## Supplementary Online Content

Tan TW, Caldwell B, Zhang Y, Kshirsagar O, Cotter DJ, Brewer TW. Foot and ankle care by podiatrists and amputations in patients with diabetes and kidney failure. *JAMA Netw Open*. 2024;7(3):e240801. doi:10.1001/jamanetworkopen.2024.0801

**eTable 1.** Diagnosis and Procedure Codes

**eMethods.** Data Sources, Variable Constructions, and Missing Data

**eTable 2.** Independent Study Variables and Related Data Sources

**eTable 3.** Association Between Study Covariates and the Likelihood of Receiving Foot and Ankle Care by Podiatrists in the 3-Months Prior to Index DFU

**eTable 4.** Association for Receipt of Foot and Ankle Care by Podiatrists and Outcomes Using Inverse Probability of Treatment Weighting (IPTW) Cox Regression Analysis for Composite Outcomes of death and/or Amputation and IPTW Competing Risk Analysis for Cumulative Incidence of Major Amputation

**eFigure.** Propensity Score Weighting for Adjusted Analyses

This supplementary material has been provided by the authors to give readers additional information about their work.

**eTable 1. Diagnosis and Procedure Codes**

| <b>Variables</b>                    | <b>Code</b>                                                                                                                                                                                                                                                                                                                                                                                                                                                                                                                                                                                                                                                                                                                                                                                                                                                                                                                                                                                                                                                                                                                                                                                                                                                                                                                                                                                            |
|-------------------------------------|--------------------------------------------------------------------------------------------------------------------------------------------------------------------------------------------------------------------------------------------------------------------------------------------------------------------------------------------------------------------------------------------------------------------------------------------------------------------------------------------------------------------------------------------------------------------------------------------------------------------------------------------------------------------------------------------------------------------------------------------------------------------------------------------------------------------------------------------------------------------------------------------------------------------------------------------------------------------------------------------------------------------------------------------------------------------------------------------------------------------------------------------------------------------------------------------------------------------------------------------------------------------------------------------------------------------------------------------------------------------------------------------------------|
| HCCPS codes for foot and ankle care | 11721,11720,11056, G0127,11719,11055,11730,11057,4040F, A5500                                                                                                                                                                                                                                                                                                                                                                                                                                                                                                                                                                                                                                                                                                                                                                                                                                                                                                                                                                                                                                                                                                                                                                                                                                                                                                                                          |
| Major amputation                    | 27590, 27591, 27592, 27594, 27596, 27598, 27880, 27881, 27882, 27884, 27886, 27888, 27889                                                                                                                                                                                                                                                                                                                                                                                                                                                                                                                                                                                                                                                                                                                                                                                                                                                                                                                                                                                                                                                                                                                                                                                                                                                                                                              |
| Minor amputation                    | 28825, 28820, 28810, 28805, 28122, 28800                                                                                                                                                                                                                                                                                                                                                                                                                                                                                                                                                                                                                                                                                                                                                                                                                                                                                                                                                                                                                                                                                                                                                                                                                                                                                                                                                               |
| Ulcer diagnosis                     | L97901, L97902, L97903, L97904, L97905, L97906, L97908, L97909, L97911, L97912, L97913, L97914, L97915, L97916, L97918, L97919, L97921, L97922, L97923, L97924, L97925, L97926, L97928, L97929, L97101, L97102, L97103, L97104, L97105, L97106, L97108, L97109, L97111, L97112, L97113, L97114, L97115, L97116, L97118, L97119, L97121, L97122, L97123, L97124, L97125, L97126, L97128, L97129, L97201, L97202, L97203, L97204, L97205, L97206, L97208, L97209, L97211, L97212, L97213, L97214, L97215, L97216, L97218, L97219, L97221, L97222, L97223, L97224, L97225, L97226, L97228, L97229, L97301, L97302, L97303, L97304, L97305, L97306, L97308, L97309, L97311, L97312, L97313, L97314, L97315, L97316, L97318, L97319, L97321, L97322, L97323, L97324, L97325, L97326, L97328, L97329, L97401, L97402, L97403, L97404, L97405, L97406, L97408, L97409, L97411, L97412, L97413, L97414, L97415, L97416, L97418, L97419, L97421, L97422, L97423, L97424, L97425, L97426, L97428, L97429, L97501, L97502, L97503, L97504, L97505, L97506, L97508, L97509, L97511, L97512, L97513, L97514, L97515, L97516, L97518, L97519, L97521, L97522, L97523, L97524, L97525, L97526, L97528, L97529, L97801, L97802, L97803, L97804, L97805, L97806, L97808, L97809, L97811, L97812, L97813, L97814, L97815, L97816, L97818, L97819, L97821, L97822, L97823, L97824, L97825, L97826, L97828, L97829, L98499 |
| Diabetes                            | E11.xxx                                                                                                                                                                                                                                                                                                                                                                                                                                                                                                                                                                                                                                                                                                                                                                                                                                                                                                                                                                                                                                                                                                                                                                                                                                                                                                                                                                                                |

| <b>Comorbidity at baseline</b>                               | <b>ICD-10-CM Code</b>                                                                                                                                                                                                                                                                                                                                                                                                                           |
|--------------------------------------------------------------|-------------------------------------------------------------------------------------------------------------------------------------------------------------------------------------------------------------------------------------------------------------------------------------------------------------------------------------------------------------------------------------------------------------------------------------------------|
| Hypertension                                                 | I10, I110, I119, I120, I129, I130, I1310, I1311, I132, I150, I151, I152, I158, I159                                                                                                                                                                                                                                                                                                                                                             |
| Chronic obstructive pulmonary disease (COPD)                 | J410, J411, J418, J42, J430, J431, J432, J438, J439, J440, J441, J449, J982, J983                                                                                                                                                                                                                                                                                                                                                               |
| Heart failure (CHF)                                          | A18.84, I09.81, I11.0, I13.0, I13.2, I40.0-I43, I50.1- I50.9, Z48.21, Z48.280, Z94.1, Z94.3, I50.20-I50.23, I50.40-I50.43                                                                                                                                                                                                                                                                                                                       |
| Cerebrovascular accident/transient ischemic attack (CVA/TIA) | G45.0-G45.2, G45.4-G46.8, I60.00-I66.9, I67.1, I67.2, I67.4-I67.82, I67.841-I69.998                                                                                                                                                                                                                                                                                                                                                             |
| Atherosclerotic heart disease (ASHD)                         | I20, I21, I22, I23, I240, I241, I248, I249, I25, I510, I512                                                                                                                                                                                                                                                                                                                                                                                     |
| Other cardiac disease                                        | I050, I051, I052, I058, I059, I060, I061, I062, I068, I069, I070, I071, I072, I078, I079, I080, I081, I082, I083, I088, I089, I091, I300, I301, I308, I309, I310, I311, I312, I313, I314, I318, I319, I32, I330, I339, I340, I341, I342, I348, I349, I350, I351, I352, I358, I359, I360, I361, I362, I368, I369, I370, I371, I372, I378, I379, I38, I39, I400, I401, I408, I409, I41, I511, I513, I514, I515, I517, I518, I519, I52, I970, I971 |

|                                    |                                                                                                                                                                        |
|------------------------------------|------------------------------------------------------------------------------------------------------------------------------------------------------------------------|
| Diabetes at initiation of dialysis | Medical Evidence File                                                                                                                                                  |
| Peripheral artery disease (PAD)    | E08.51, E08.52, E09.51, E09.52, E10.51, E10.52, E11.51, E11.52, E13.51, E13.52, I67.0, I70.0-I74.9, I77.0-I77.9, I79.0-I79.8, K55.0, K55.1, K55.8, K55.9, M31.8, M31.9 |
| Coronary artery disease (CAD)      | I12.00-I22.9, I24.0-I25.9, Z95.1, Z95.5, Z98.61                                                                                                                        |

## **eMethods. Data sources, variable constructions, and missing data**

### **1) Data sources.**

Standard analytical files (SAF's) collected and maintained by the United States Renal Data System (USRDS) were used to obtain patient clinical history and characteristics. This database incorporates extensive baseline and follow-up demographic and clinical data on ESRD patients whose care is covered by the Medicare program. Individual patient demographics were obtained from the PATIENTS file in the USRDS Core CD. Patient clinical factors at the initiation of ESKD were extracted from Medical Evidence file (CMS 2728 form). Patient co-morbid conditions and severity of illness were obtained from the institutional claims' files. Diagnosis and procedures were identified from both outpatient, inpatient, and physician claims. Physician claims were also used to extract physician Specialty. The variables included in the USRDS SAF's, as well as the data source, collection methods, and validation studies, are listed at the USRDS website, <https://www.niddk.nih.gov/about-niddk/strategic-plans-reports/usrds>. We used the USRDS standard analytic files as of calendar years between 2016 and 2019 for the analysis reported in the manuscript.

### **2) Variable construction**

For study outcomes, death information was obtained from Patients file. Major amputation (above-knee, below-knee) was identified by CPT codes (eTable 1) from inpatient, outpatient, and physician/supplier claim files. eTable 2 below lists the descriptions of independent variables included in the analyses.

### **3) Missing data**

Variables with missing values include drug/alcohol use, diabetes status, institutionalization status, primary cause of renal failure, and pre-dialysis nephrology care. Specifically, for variables such as drug and alcohol use, diabetes (insulin use) status, and institutionalization status, the extent of missing data is minimal, comprising only 0.6%. This missing data is evenly distributed across the groups. As for the causes of renal failure, there were a total of 181 cases with unknown

causes, with 141 (1.2%) in the group without podiatry care and 40 (1.5%) in the group with podiatry care. Predominantly, missing values were related to pre-dialysis nephrology care, with 764 cases missing and 1,692 unknowns, totaling 2,456 (16.2% in the without-podiatry-care group and 17.7% in the with-podiatry-care group).

In our main analysis, we treated missing cases of pre-dialysis nephrology care as a distinct category in our models, facilitating a complete case analysis. In sensitivity analysis, we excluded missing values and repeating the analysis. Results reported in the manuscript remained essentially unchanged with the exclusion of the missing data category.

**eTable 2.** Independent study variables and related data sources

| <i>Variables</i>                                      | <i>Description</i>                                                                                                            | <i>Data Source</i>                                       |
|-------------------------------------------------------|-------------------------------------------------------------------------------------------------------------------------------|----------------------------------------------------------|
| <b>Demographics</b>                                   |                                                                                                                               |                                                          |
| Age at first ESRD service                             | Categorized into 3 groups: < 50, 50 - < 65, and ≥65                                                                           | USRDS Patients file                                      |
| Gender                                                | Male/Female                                                                                                                   | USRDS Patients file                                      |
| Race                                                  | Asian, Black/African American<br>Other (American Indian, Alaska native, Pacific Islander, or native Hawaiian) and White       | USRDS Patients file                                      |
| Hispanic ethnicity                                    | yes/no                                                                                                                        | USRDS Patients file                                      |
| Dual eligibility of Medicare and Medicaid             | yes/no                                                                                                                        | USRDS Medical Evidence file                              |
| <b>Clinical characteristics at initiation of ESRD</b> |                                                                                                                               |                                                          |
| Primary cause of ESKD*                                | Diabetes/Hypertension/<br>Glomerulonephritis/Other                                                                            | USRDS Patients file                                      |
| Body mass index (kg/m <sup>2</sup> )                  | Categorized into 4 groups: 0 - < 25, 25 - < 30, 30 - < 35, ≥ 35                                                               | USRDS Medical Evidence data                              |
| Nephrology care before initiation of dialysis*        | yes/no                                                                                                                        | USRDS Medical Evidence file                              |
| Diabetes on insulin at initiation of dialysis*        | yes/no                                                                                                                        | USRDS Medical Evidence file                              |
| Alcohol/Drug Use*                                     | yes/no                                                                                                                        | USRDS Medical Evidence file                              |
| Need assistance with activities of daily living*      | yes/no                                                                                                                        | USRDS Medical Evidence file                              |
| Institutionalized*                                    | yes/no                                                                                                                        | USRDS Medical Evidence file                              |
| <b>Dialysis related characteristics</b>               |                                                                                                                               |                                                          |
| Dialysis modality                                     | Hemodialysis/Peritoneal dialysis                                                                                              | USRDS outpatient dialysis claims file                    |
| Duration of dialysis, y                               | Time between the initiation of dialysis and study baseline; categorized into 4 groups: < 2.5, 2.5 - < 4, 4 - < 6.5, and ≥ 6.5 | USRDS Patients file and claims file                      |
| <b>Comorbidities and hospitalization</b>              |                                                                                                                               |                                                          |
| Hypertension                                          | yes/no                                                                                                                        | USRDS institutional claims and physician/supplier claims |
| Chronic obstructive pulmonary disease (COPD)          | yes/no                                                                                                                        | USRDS institutional claims and physician/supplier claims |
| Congestive heart failure (CHF)                        | yes/no                                                                                                                        | USRDS institutional claims and physician/supplier claims |

| <i>Variables</i>                                                     | <i>Description</i>             | <i>Data Source</i>                                          |
|----------------------------------------------------------------------|--------------------------------|-------------------------------------------------------------|
| Cerebrovascular accident/<br>transient ischemic attack (CVA/<br>TIA) | yes/no                         | USRDS institutional claims and<br>physician/supplier claims |
| Atherosclerotic heart<br>disease (ASHD)                              | yes/no                         | USRDS institutional claims and<br>physician/supplier claims |
| Peripheral arterial disease (PAD)                                    | yes/no                         | USRDS institutional claims and<br>physician/supplier claims |
| Coronary artery disease (CAD)                                        | yes/no                         | USRDS institutional claims and<br>physician/supplier claims |
| Other cardiac conditions                                             | yes/no                         | USRDS institutional claims and<br>physician/supplier claims |
| Charlson Comorbidities Index<br>(CCI) Score                          | < 6, 6 - < 8, 8 - < 9, and ≥ 9 | USRDS institutional claims and<br>physician/supplier claims |
| Duration of hospitalization, days                                    | 0, 1 - < 10, and ≥ 10          | USRDS institutional claims and<br>physician/supplier claims |

**eTable 3. Association between study covariates and the likelihood of receiving foot and ankle care by podiatrists in the 3-months prior to index DFU.**

| <i>Variables</i>                                                   | <i>OR</i> | <i>LL</i> | <i>UL</i> |
|--------------------------------------------------------------------|-----------|-----------|-----------|
| <b>Patient Demographics</b>                                        |           |           |           |
| Age (ref < 50)                                                     |           |           |           |
| 50 - < 65                                                          | 1.47      | 1.29      | 1.67      |
| ≥ 65                                                               | 2.31      | 2.02      | 2.65      |
| Gender (ref Female)                                                | 1.12      | 1.03      | 1.23      |
| Race (ref White)                                                   |           |           |           |
| Black/African American                                             | 0.96      | 0.87      | 1.07      |
| Asian                                                              | 0.86      | 0.66      | 1.12      |
| Other/unknown                                                      | 0.41      | 0.30      | 0.57      |
| Hispanic ethnicity (ref Yes)                                       | 1.14      | 1.00      | 1.29      |
| Dual eligibility of Medicare and Medicaid (ref No)                 | 1.01      | 0.92      | 1.10      |
| <b>Clinical characteristics at initiation of ESRD (2728 form)*</b> |           |           |           |
| BMI (ref < 25)                                                     |           |           |           |
| 25 - < 30                                                          | 0.97      | 0.85      | 1.10      |
| 30 - < 35                                                          | 0.97      | 0.85      | 1.11      |
| ≥ 35                                                               | 1.04      | 0.92      | 1.18      |
| Primary Cause of renal failure detailed group (ref Diabetes)       |           |           |           |
| Hypertension                                                       | 0.97      | 0.86      | 1.09      |
| Glomerulonephritis                                                 | 0.90      | 0.69      | 1.19      |
| Other/Unknown                                                      | 0.93      | 0.77      | 1.12      |
| Nephrologist (ref No)                                              |           |           |           |
| Yes                                                                | 1.26      | 1.12      | 1.41      |
| Unknown                                                            | 1.39      | 1.21      | 1.61      |
| Diabetes on insulin at initiation of dialysis (ref No)             | 1.05      | 0.96      | 1.16      |
| Alcohol/Drug Use (ref No)                                          | 0.97      | 0.67      | 1.41      |
| Need assistance with activities of daily living (ref No)           | 0.94      | 0.80      | 1.09      |
| Institutionalized (ref No)                                         | 1.87      | 1.55      | 2.24      |
| <b>Dialysis related characteristics</b>                            |           |           |           |
| Modality at baseline (ref hemodialysis)                            |           |           |           |
| Peritoneal dialysis                                                | 0.88      | 0.73      | 1.05      |
| Duration of dialysis ref (< 2.5 yrs)                               |           |           |           |
| 2.5 yrs - < 4 yrs                                                  | 1.02      | 0.89      | 1.18      |
| 4 yrs - < 6.5 yrs                                                  | 1.28      | 1.12      | 1.46      |
| ≥ 6.5 yrs                                                          | 1.45      | 1.27      | 1.66      |
| <b>Comorbidities in Baseline</b>                                   |           |           |           |
| Hypertension (ref No)                                              | 1.11      | 0.97      | 1.26      |
| Chronic obstructive pulmonary disease (COPD) (ref No)              | 1.01      | 0.90      | 1.14      |
| Congestive heart failure (ref Yes)                                 | 1.18      | 1.06      | 1.32      |



|                                                                                                        |      |      |      |
|--------------------------------------------------------------------------------------------------------|------|------|------|
| Cerebrovascular accident/ transient ischemic attack (CVA/ TIA) (ref No)                                | 1.06 | 0.94 | 1.19 |
| Atherosclerotic heart disease (ASHD) (ref No)                                                          | 0.97 | 0.83 | 1.13 |
| Peripheral arterial disease (ref No)                                                                   | 1.68 | 1.51 | 1.87 |
| Coronary artery disease (CAD) (ref No)                                                                 | 1.02 | 0.93 | 1.13 |
| Other cardiac conditions (ref No)                                                                      | 0.92 | 0.83 | 1.02 |
| Charlson index score (ref < 6)                                                                         |      |      |      |
| 6 - < 8                                                                                                | 1.38 | 1.22 | 1.55 |
| 8 - < 9                                                                                                | 1.64 | 1.36 | 1.98 |
| ≥ 9                                                                                                    | 1.44 | 1.18 | 1.76 |
| Hospitalization (ref No)                                                                               | 2.00 | 1.81 | 2.20 |
| OR: odds ratio; LL: lower limit of 95% confidence interval; UL: upper limit of 95% confidence interval |      |      |      |

**eTable 4. Association for receipt of foot and ankle care by podiatrists and outcomes using inverse probability of treatment weighting (IPTW) Cox Regression analysis for composite outcomes of death and/or amputation and IPTW competing risk analysis for cumulative incidence of major amputation**

| <b>eTable S4a: Hazard ratio for a composite of death and/or major amputation based on IPTW Cox Regression</b> |                     |                        |                        |                                    |
|---------------------------------------------------------------------------------------------------------------|---------------------|------------------------|------------------------|------------------------------------|
| <b>Variable</b>                                                                                               | <b>Hazard Ratio</b> | <b>95% Lower Limit</b> | <b>95% Upper Limit</b> | <b>Probability &gt; Chi-square</b> |
| Foot and ankle care by podiatrists (ref No)                                                                   | 0.89                | 0.84                   | 0.93                   | <.0001                             |
| <b>Patient Demographics</b>                                                                                   |                     |                        |                        |                                    |
| Gender (ref Male)                                                                                             | 0.86                | 0.82                   | 0.89                   | <.0001                             |
| Age*                                                                                                          | 1.02                | 1.01                   | 1.02                   | <.0001                             |
| Race of patient (ref White)                                                                                   |                     |                        |                        |                                    |
| Black/African American                                                                                        | 0.89                | 0.85                   | 0.93                   | <.0001                             |
| Asian                                                                                                         | 0.82                | 0.72                   | 0.92                   | 0.0008                             |
| Other/ unknown                                                                                                | 0.85                | 0.76                   | 0.94                   | 0.0021                             |
| Hispanic ethnicity (ref No)                                                                                   | 0.82                | 0.77                   | 0.87                   | <.0001                             |
| Dual eligibility of Medicare and Medicaid (ref No)                                                            |                     |                        |                        |                                    |
| Yes                                                                                                           | 1.04                | 0.99                   | 1.11                   | 0.1432                             |
| <b>Clinical characteristics at initiation of end-stage kidney disease (2728 form) *</b>                       |                     |                        |                        |                                    |
| Body mass index (BMI)                                                                                         |                     |                        |                        |                                    |
| BMI*                                                                                                          | 1.00                | 0.98                   | 1.01                   | 0.5293                             |
| Primary Cause of renal failure detailed group (ref Diabetes)                                                  |                     |                        |                        |                                    |
| Hypertension                                                                                                  | 0.98                | 0.93                   | 1.03                   | 0.3542                             |
| Glomerulonephritis                                                                                            | 0.96                | 0.86                   | 1.08                   | 0.5217                             |
| Other/Unknown                                                                                                 | 0.96                | 0.88                   | 1.04                   | 0.2681                             |
| Nephrologist at initiation of dialysis (ref Yes)                                                              |                     |                        |                        |                                    |
| No                                                                                                            | 1.01                | 0.96                   | 1.06                   | 0.7425                             |
| Unknown                                                                                                       | 1.02                | 0.96                   | 1.09                   | 0.4585                             |
| Diabetes on insulin at initiation of dialysis (ref No)                                                        | 1.10                | 1.05                   | 1.14                   | <.0001                             |
| Alcohol/ Drug Use (ref No)                                                                                    | 1.06                | 0.92                   | 1.23                   | 0.4133                             |
| Need assistance with activities of daily living (ref No)                                                      | 0.97                | 0.91                   | 1.04                   | 0.3948                             |
| Institutionalized (ref No)                                                                                    |                     |                        |                        |                                    |
| Yes                                                                                                           | 1.03                | 0.95                   | 1.12                   | 0.4915                             |
| <b>Dialysis related characteristics</b>                                                                       |                     |                        |                        |                                    |
| Modality at baseline (ref Hemodialysis)                                                                       |                     |                        |                        |                                    |
| Peritoneal dialysis                                                                                           | 1.28                | 1.19                   | 1.39                   | <.0001                             |
| Duration of dialysis                                                                                          |                     |                        |                        |                                    |
| Dialysis duration*                                                                                            | 1.05                | 1.00                   | 1.09                   | 0.0417                             |
| <b>Comorbidities in Baseline</b>                                                                              |                     |                        |                        |                                    |

|                                                                       |      |      |      |        |
|-----------------------------------------------------------------------|------|------|------|--------|
| Hypertension (ref No)                                                 | 0.87 | 0.82 | 0.92 | <.0001 |
| Chronic obstructive pulmonary disease (COPD) (ref No)                 | 1.07 | 1.02 | 1.13 | 0.0109 |
| Congestive heart failure (CHF) (ref No)                               | 1.10 | 1.05 | 1.16 | 0.0001 |
| Cerebrovascular accident/Transient ischemic attack (CVA/TIA) (ref No) | 1.05 | 0.99 | 1.11 | 0.0783 |
| Atherosclerotic heart disease (ASHD) (ref No)                         | 1.00 | 0.94 | 1.07 | 0.9075 |
| Peripheral arterial disease (PAD) (ref No)                            | 1.12 | 1.06 | 1.17 | <.0001 |
| Coronary artery disease (CAD) (ref No)                                | 1.1  | 1.06 | 1.15 | <.0001 |
| Other cardiac conditions (ref No)                                     | 1.00 | 0.95 | 1.04 | 0.8173 |
| Charlson Index Score                                                  |      |      |      |        |
| CCI*                                                                  | 0.99 | 0.96 | 1.03 | 0.662  |
| Number of days patient is hospitalized                                |      |      |      |        |
| Total hospital days*                                                  | 1.06 | 1.05 | 1.06 | <.0001 |

| <b>eTable S4b: Hazard ratio for major amputation based on IPTW competing risk analysis</b> |                     |                        |                        |                                    |
|--------------------------------------------------------------------------------------------|---------------------|------------------------|------------------------|------------------------------------|
| <b>Variable</b>                                                                            | <b>Hazard Ratio</b> | <b>95% Lower Limit</b> | <b>95% Upper Limit</b> | <b>Probability &gt; Chi-square</b> |
| Foot and ankle care by podiatrists (ref No)                                                | 0.91                | 0.84                   | 0.99                   | 0.0251                             |
| <b>Patient Demographics</b>                                                                |                     |                        |                        |                                    |
| Gender (ref Male)                                                                          | 0.69                | 0.65                   | 0.74                   | <.0001                             |
| Age*                                                                                       | 1.01                | 1.01                   | 1.02                   | 0.0007                             |
| Race of patient (ref White)                                                                |                     |                        |                        |                                    |
| Black/African American                                                                     | 1.35                | 1.25                   | 1.45                   | <.0001                             |
| Asian                                                                                      | 0.83                | 0.67                   | 1.03                   | 0.0967                             |
| Other/unknown                                                                              | 0.98                | 0.83                   | 1.16                   | 0.8065                             |
| Hispanic ethnicity (ref No)                                                                | 1.08                | 0.99                   | 1.19                   | 0.077                              |
| Dual eligibility of Medicare and Medicaid (ref No)                                         |                     |                        |                        |                                    |
| Yes                                                                                        | 0.99                | 0.93                   | 1.06                   | 0.7489                             |
| <b>Clinical characteristics at initiation of ESKD (2728 form)*</b>                         |                     |                        |                        |                                    |
| Body Mass Index (BMI)                                                                      |                     |                        |                        |                                    |
| BMI*                                                                                       | 1.02                | 1.00                   | 1.05                   | 0.1062                             |
| Primary cause of renal failure detailed group (ref Diabetes)                               |                     |                        |                        |                                    |
| Hypertension                                                                               | 0.89                | 0.82                   | 0.97                   | 0.011                              |
| Glomerulonephritis                                                                         | 0.88                | 0.72                   | 1.07                   | 0.1906                             |
| Other/Unknown                                                                              | 0.74                | 0.63                   | 0.87                   | 0.0002                             |
| Nephrologist at initiation of dialysis (ref Yes)                                           |                     |                        |                        |                                    |
| No                                                                                         | 0.93                | 0.86                   | 1.00                   | 0.0506                             |

|                                                                       |      |      |      |        |
|-----------------------------------------------------------------------|------|------|------|--------|
| Unknown                                                               | 0.97 | 0.88 | 1.07 | 0.5321 |
| Diabetes on insulin at initiation of dialysis (ref No)                | 1.12 | 1.04 | 1.2  | 0.0021 |
| Alcohol/Drug Use (ref No)                                             | 0.92 | 0.72 | 1.18 | 0.5057 |
| Need assistance with activities of daily living (ref No)              | 0.91 | 0.81 | 1.02 | 0.1052 |
| Institutionalized (ref No)                                            |      |      |      |        |
| Yes                                                                   | 0.88 | 0.74 | 1.04 | 0.1259 |
| <b>Dialysis related characteristics</b>                               |      |      |      |        |
| Modality at baseline (ref hemodialysis)                               |      |      |      |        |
| Peritoneal dialysis                                                   | 1.13 | 1.01 | 1.27 | 0.0334 |
| Duration of dialysis                                                  |      |      |      |        |
| Dialysis duration*                                                    | 0.92 | 0.86 | 0.99 | 0.0206 |
| <b>Comorbidities in baseline</b>                                      |      |      |      |        |
| Hypertension (ref No)                                                 | 0.82 | 0.75 | 0.9  | <.0001 |
| Chronic obstructive pulmonary disease (COPD) (ref No)                 | 0.81 | 0.73 | 0.89 | <.0001 |
| Congestive heart failure (CHF) (ref No)                               | 0.88 | 0.82 | 0.96 | 0.0026 |
| Cerebrovascular accident/Transient ischemic attack (CVA/TIA) (ref No) | 0.99 | 0.90 | 1.08 | 0.7584 |
| Atherosclerotic heart disease (ASHD) (ref No)                         | 0.99 | 0.88 | 1.1  | 0.8261 |
| Peripheral arterial disease (PAD) (ref No)                            | 1.35 | 1.25 | 1.47 | <.0001 |
| Coronary artery disease (CAD) (ref No)                                | 1.09 | 1.02 | 1.18 | 0.0136 |
| Other cardiac conditions (ref No)                                     | 0.8  | 0.74 | 0.87 | <.0001 |
| Charlson Comorbidities Index (CCI) Score                              |      |      |      |        |
| CCI*                                                                  | 1.02 | 0.97 | 1.08 | 0.4437 |
| No of days patient is hospitalized                                    |      |      |      |        |
| Total hospital days*                                                  | 1.06 | 1.05 | 1.07 | <.0001 |

\*Different splines for these continuous covariates were created and used to capture potential non-linear relationships with the outcome variable, allowing for flexibility in modeling the non-linear effects of each variable independently. These spline variables were created using Frank Harrell's SAS Macro %RCSPLINE. Specific spline placements are listed in the table below (also included in supplemental files). The choice of splines was based on percentile distribution of the observed data to capture potential non-linearities. We considered various spline options and experimented with different knot placements to optimize model fit while avoiding overfitting.

| Age         |        | Total inpatient days |        | CCI         |        | BMI         |        | Dialysis duration |        |
|-------------|--------|----------------------|--------|-------------|--------|-------------|--------|-------------------|--------|
| Percentiles | Values | Percentiles          | Values | Percentiles | Values | Percentiles | Values | Percentiles       | Values |
| 5           | 37     | 5                    | 3      | 5           | 3      | 5           | 21     | 5                 | 2      |
| 10          | 43     | 25                   | 6      | 25          | 5      | 25          | 26     | 25                | 3      |
| 25          | 54     | 50                   | 10     | 75          | 8      | 50          | 31     | 75                | 6      |
| 75          | 66     | 75                   | 20     | 95          | 11     | 75          | 39     | 95                | 11     |
| 95          | 80     | 95                   | 55     |             |        | 95          | 46     |                   |        |

**eFigure. Propensity score weighting for adjusted analyses.**

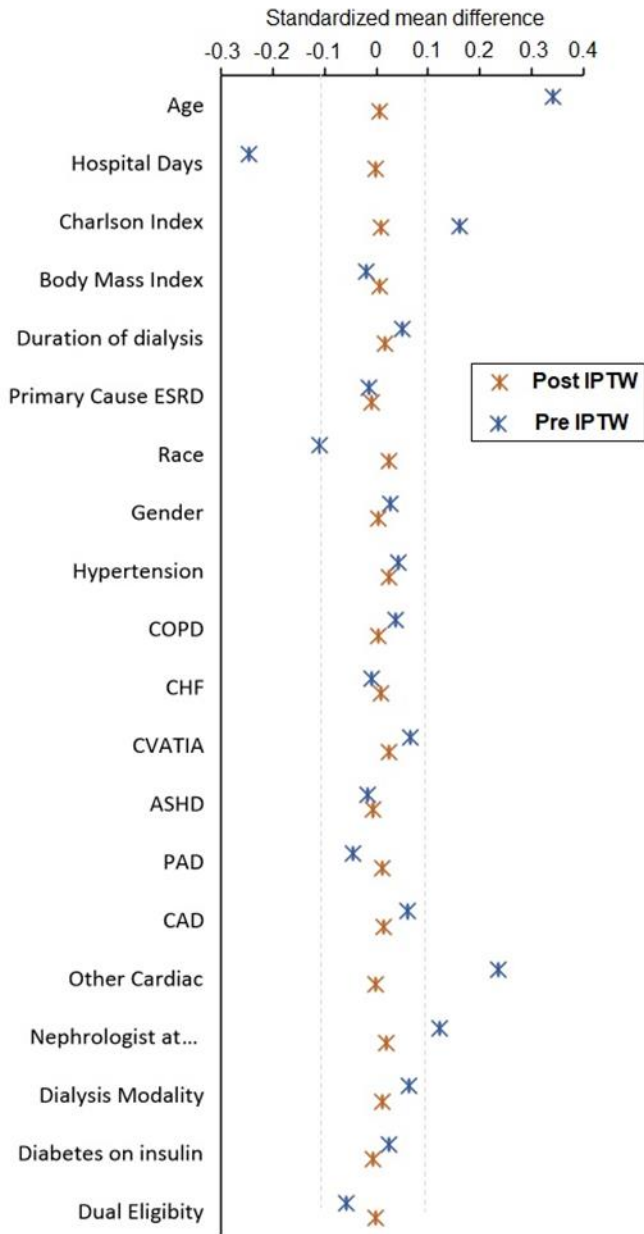

Balance of propensity score weighting was assessed before and after weighting using absolute standardized mean difference. A value of  $<0.1$  was considered balance.
